# Supplementary material
Source: publisher figshare collection journal article supplement (https://gsapubs.figshare.com/ndownloader/files/22398660)
Supplement: Supplementary file 1 [file 22398660]

SUPPLEMENTAL TABLE. LAKE BONNEVILLE SHORELINE ALTITUDES IN FEET (M) AT VARIOUS LOCATIONS

|                                                                                                                                                                                                | Bonneville shoreline altitude at its sill in feet<br>(m)                                                             | Provo shoreline altitude at its sill in feet<br>(m)                                                                                                                                                                                                                                                                                                                                                                                            | Location of sill for<br>Provo shoreline                          |
|------------------------------------------------------------------------------------------------------------------------------------------------------------------------------------------------|----------------------------------------------------------------------------------------------------------------------|------------------------------------------------------------------------------------------------------------------------------------------------------------------------------------------------------------------------------------------------------------------------------------------------------------------------------------------------------------------------------------------------------------------------------------------------|------------------------------------------------------------------|
| <b>Gilbert, 1890</b>                                                                                                                                                                           |                                                                                                                      |                                                                                                                                                                                                                                                                                                                                                                                                                                                | "Between Swan Lake<br>and Round Valley"<br>Red Rock Pass         |
| <b>Hardy, 1956, Keller, 1952,<br/>Coulter, 1954, Link,<br/>1982</b>                                                                                                                            | 5135 ft (1556 m) at Red Rock Pass                                                                                    | 4800 ft (1463 m) at Red Rock Pass                                                                                                                                                                                                                                                                                                                                                                                                              |                                                                  |
| <b>Williams, 1962</b>                                                                                                                                                                          | 5135 ft (1556 m) - highest trace of channel                                                                          | 4770 ft (1454 m) at Red Rock Pass                                                                                                                                                                                                                                                                                                                                                                                                              | Red Rock Pass                                                    |
| <b>Crittenden, 1963</b>                                                                                                                                                                        | 5085 ft (1550 m)                                                                                                     |                                                                                                                                                                                                                                                                                                                                                                                                                                                | Red Rock Pass                                                    |
| <b>Bright, 1966</b>                                                                                                                                                                            | 5130 (1564 m)                                                                                                        | 4775 ft (1446 m)                                                                                                                                                                                                                                                                                                                                                                                                                               | Red Rock Pass                                                    |
| <b>Bright, 1963 and 1966</b>                                                                                                                                                                   | 5105 ± 5 ft (1556±1.5 m)                                                                                             | 4775 ft ± 5 ft (1446± 1.5 m)                                                                                                                                                                                                                                                                                                                                                                                                                   | Red Rock Pass                                                    |
| <b>Currey, 1982</b>                                                                                                                                                                            | 5090 ft with drop to 5050 ft before the flood (1552<br>m dropping to 1540 m)                                         | 4737 ft (1444 m) corrected for rebound<br>4751 ft 7 km northwest of Preston (not corrected for rebound)<br>4770 ft near Weston, Idaho (not corrected for rebound)<br>P high=4741 ft (1445 m) in Red Rock Pass area<br>P low=4710 ft (1436 m) in Red Rock Pass area<br>4710 ft (1436 m) bedrock level at Red Rock Pass with p1 to p5<br>increasing in level to as high as 4740 ft (1445 m). Three<br>landslides raised the spillway temporarily | Red Rock Pass<br>Red Rock Pass<br>Red Rock Pass<br>Red Rock Pass |
| <b>Burr and Currey, 1988,<br/>Currey and Burr, 1988</b>                                                                                                                                        | 5090 ft (1552 m)                                                                                                     |                                                                                                                                                                                                                                                                                                                                                                                                                                                | Red Rock Pass                                                    |
| <b>Lemons, 1997</b>                                                                                                                                                                            | 5155 ft (1555 ± 2 m) south of Preston                                                                                |                                                                                                                                                                                                                                                                                                                                                                                                                                                | Red Rock Pass                                                    |
| <b>Link et al., 1999</b>                                                                                                                                                                       | 5090 ft at Zenda threshold (1552 m)                                                                                  | 4740 ft (1445m)                                                                                                                                                                                                                                                                                                                                                                                                                                | Red Rock Pass                                                    |
| <b>Williams and Milligan,<br/>1968</b>                                                                                                                                                         |                                                                                                                      | 4756 ±1 ft (1450 m) at bedrock saddle at Red Rock Pass                                                                                                                                                                                                                                                                                                                                                                                         | Red Rock Pass                                                    |
| <b>McCalpin, 1994</b>                                                                                                                                                                          | 5165 ±10 ft (1574 m) in southern Cache Valley<br>5107± 1 ft (~1557 m) at Franklin, Idaho                             |                                                                                                                                                                                                                                                                                                                                                                                                                                                | Red Rock Pass                                                    |
| <b>This study:</b>                                                                                                                                                                             | ~5110±10 ft (1558±3 m) north of Red Rock Pass<br>at Zenda threshold, with low confidence due to<br>subtle expression | 4760-4780 ft (1451-1457 m) higher shoreline<br>and 4740-4745 ft (1445 to 1447 m) lower shoreline                                                                                                                                                                                                                                                                                                                                               | Swan Lake<br>and then Clifton sill                               |
| <i>Note: Altitudes are for the area near at Zenda, Idaho or Red Rock Pass, or are altitudes that were corrected for an elevation at Zenda, Idaho or Red Rock Pass by the original authors.</i> |                                                                                                                      |                                                                                                                                                                                                                                                                                                                                                                                                                                                |                                                                  |
